# Supplementary material for: Time trend of measles burden on children and adolescents in BRICS-plus countries from 1990 to 2021 and prediction to 2032
Source: Front Microbiol. 2025 Jul 24;16:1612124. doi: 10.3389/fmicb.2025.1612124 (PMC12328342; doi:10.3389/fmicb.2025.1612124)
Supplement: Supplementary file 15 [file Table_10.xlsx]

## Sheet: Egypt
Supplementary table 10:Temporal Joinpoint Analysis of measles in children and adolescents in Egypt, 1990-2021
	sex	Start	End	measure	val	lower	upper	95% CI	P.Value
Prevalence	Both	1990	2021	AAPC	-15.03	-27.39	-0.58	-15.03(-27.39--0.58)	0.042122
	Female	1990	2021	AAPC	-15.03	-27.39	-0.57	-15.03(-27.39--0.57)	0.042176
	Male	1990	2021	AAPC	-15.04	-27.39	-0.58	-15.04(-27.39--0.58)	0.042071
	Both	1990	2000	APC	-7.33	-14.69	0.65	-7.33(-14.69-0.65)	0.068346
	Both	2000	2003	APC	-54.5	-83.77	27.58	-54.5(-83.77-27.58)	0.12438
	Both	2003	2008	APC	12.2	-18.61	54.69	12.2(-18.61-54.69)	0.456576
	Both	2008	2011	APC	-54.53	-84.31	31.81	-54.53(-84.31-31.81)	0.135354
	Both	2011	2015	APC	125.24	33.52	279.97	125.24(33.52-279.97)	0.004762
	Both	2015	2021	APC	-43.13	-50.34	-34.87	-43.13(-50.34--34.87)	<0.001
	Female	1990	2000	APC	-7.34	-14.69	0.65	-7.34(-14.69-0.65)	0.068148
	Female	2000	2003	APC	-54.51	-83.78	27.58	-54.51(-83.78-27.58)	0.124354
	Female	2003	2008	APC	12.15	-18.66	54.62	12.15(-18.66-54.62)	0.458609
	Female	2008	2011	APC	-54.56	-84.33	31.74	-54.56(-84.33-31.74)	0.135085
	Female	2011	2015	APC	125.26	33.51	280.04	125.26(33.51-280.04)	0.004768
	Female	2015	2021	APC	-43.07	-50.29	-34.8	-43.07(-50.29--34.8)	<0.001
	Male	1990	2000	APC	-7.33	-14.69	0.66	-7.33(-14.69-0.66)	0.068541
	Male	2000	2003	APC	-54.49	-83.76	27.59	-54.49(-83.76-27.59)	0.124407
	Male	2003	2008	APC	12.26	-18.57	54.75	12.26(-18.57-54.75)	0.454595
	Male	2008	2011	APC	-54.49	-84.3	31.88	-54.49(-84.3-31.88)	0.135617
	Male	2011	2015	APC	125.23	33.53	279.9	125.23(33.53-279.9)	0.004757
	Male	2015	2021	APC	-43.18	-50.39	-34.93	-43.18(-50.39--34.93)	<0.001
Incidence	Both	1990	2021	AAPC	-15.03	-27.39	-0.58	-15.03(-27.39--0.58)	0.042122
	Female	1990	2021	AAPC	-15.03	-27.39	-0.57	-15.03(-27.39--0.57)	0.042176
	Male	1990	2021	AAPC	-15.04	-27.39	-0.58	-15.04(-27.39--0.58)	0.042071
	Both	1990	2000	APC	-7.33	-14.69	0.65	-7.33(-14.69-0.65)	0.068346
	Both	2000	2003	APC	-54.5	-83.77	27.58	-54.5(-83.77-27.58)	0.12438
	Both	2003	2008	APC	12.2	-18.61	54.69	12.2(-18.61-54.69)	0.456576
	Both	2008	2011	APC	-54.53	-84.31	31.81	-54.53(-84.31-31.81)	0.135354
	Both	2011	2015	APC	125.24	33.52	279.97	125.24(33.52-279.97)	0.004762
	Both	2015	2021	APC	-43.13	-50.34	-34.87	-43.13(-50.34--34.87)	<0.001
	Female	1990	2000	APC	-7.34	-14.69	0.65	-7.34(-14.69-0.65)	0.068148
	Female	2000	2003	APC	-54.51	-83.78	27.58	-54.51(-83.78-27.58)	0.124354
	Female	2003	2008	APC	12.15	-18.66	54.62	12.15(-18.66-54.62)	0.458609
	Female	2008	2011	APC	-54.56	-84.33	31.74	-54.56(-84.33-31.74)	0.135085
	Female	2011	2015	APC	125.26	33.51	280.04	125.26(33.51-280.04)	0.004768
	Female	2015	2021	APC	-43.07	-50.29	-34.8	-43.07(-50.29--34.8)	<0.001
	Male	1990	2000	APC	-7.33	-14.69	0.66	-7.33(-14.69-0.66)	0.068541
	Male	2000	2003	APC	-54.49	-83.76	27.59	-54.49(-83.76-27.59)	0.124407
	Male	2003	2008	APC	12.26	-18.57	54.75	12.26(-18.57-54.75)	0.454595
	Male	2008	2011	APC	-54.49	-84.3	31.88	-54.49(-84.3-31.88)	0.135617
	Male	2011	2015	APC	125.23	33.53	279.9	125.23(33.53-279.9)	0.004757
	Male	2015	2021	APC	-43.18	-50.39	-34.93	-43.18(-50.39--34.93)	<0.001
Deaths	Both	1990	2021	AAPC	-16.89	-30.06	-1.25	-16.89(-30.06--1.25)	0.035469
	Female	1990	2021	AAPC	-16.82	-30.01	-1.15	-16.82(-30.01--1.15)	0.036447
	Male	1990	2021	AAPC	-16.88	-30.06	-1.23	-16.88(-30.06--1.23)	0.035637
	Both	1990	2000	APC	-11.92	-18.13	-5.24	-11.92(-18.13--5.24)	0.002137
	Both	2000	2003	APC	-55.22	-83.03	18.13	-55.22(-83.03-18.13)	0.097851
	Both	2003	2008	APC	13.57	-18.4	58.06	13.57(-18.4-58.06)	0.424804
	Both	2008	2011	APC	-56.44	-85.4	29.93	-56.44(-85.4-29.93)	0.125886
	Both	2011	2014	APC	169.63	-7.18	683.2	169.63(-7.18-683.2)	0.066033
	Both	2014	2021	APC	-36.46	-45.24	-26.28	-36.46(-45.24--26.28)	<0.001
	Female	1990	2000	APC	-12.39	-18.61	-5.69	-12.39(-18.61--5.69)	0.001652
	Female	2000	2003	APC	-54.88	-83.49	23.29	-54.88(-83.49-23.29)	0.112171
	Female	2003	2008	APC	13.53	-18.4	57.93	13.53(-18.4-57.93)	0.42559
	Female	2008	2011	APC	-56.68	-84.72	22.85	-56.68(-84.72-22.85)	0.107733
	Female	2011	2014	APC	169.53	-9.13	699.41	169.53(-9.13-699.41)	0.070924
	Female	2014	2021	APC	-35.77	-44.58	-25.56	-35.77(-44.58--25.56)	<0.001
	Male	1990	2000	APC	-11.45	-17.7	-4.72	-11.45(-17.7--4.72)	0.002976
	Male	2000	2003	APC	-55.63	-83.28	17.76	-55.63(-83.28-17.76)	0.096279
	Male	2003	2008	APC	13.87	-18	58.12	13.87(-18-58.12)	0.412459
	Male	2008	2011	APC	-56.79	-85.36	27.54	-56.79(-85.36-27.54)	0.119233
	Male	2011	2014	APC	170.98	-7.15	690.81	170.98(-7.15-690.81)	0.065885
	Male	2014	2021	APC	-36.71	-45.72	-26.22	-36.71(-45.72--26.22)	<0.001
DALYs	Both	1990	2021	AAPC	-16.86	-30.07	-1.17	-16.86(-30.07--1.17)	0.036307
	Female	1990	2021	AAPC	-16.79	-29.98	-1.13	-16.79(-29.98--1.13)	0.036736
	Male	1990	2021	AAPC	-16.86	-30.05	-1.17	-16.86(-30.05--1.17)	0.036261
	Both	1990	2000	APC	-11.9	-18.13	-5.19	-11.9(-18.13--5.19)	0.002233
	Both	2000	2003	APC	-55.2	-83.08	18.64	-55.2(-83.08-18.64)	0.099235
	Both	2003	2008	APC	13.59	-18.47	58.26	13.59(-18.47-58.26)	0.425741
	Both	2008	2011	APC	-56.45	-85.42	30.11	-56.45(-85.42-30.11)	0.12632
	Both	2011	2014	APC	170.12	-7.28	686.93	170.12(-7.28-686.93)	0.066256
	Both	2014	2021	APC	-36.46	-45.25	-26.25	-36.46(-45.25--26.25)	<0.001
	Female	1990	2000	APC	-12.36	-18.6	-5.65	-12.36(-18.6--5.65)	0.001698
	Female	2000	2003	APC	-54.85	-83.48	23.41	-54.85(-83.48-23.41)	0.112557
	Female	2003	2008	APC	13.52	-18.42	57.96	13.52(-18.42-57.96)	0.42608
	Female	2008	2011	APC	-56.66	-84.7	22.76	-56.66(-84.7-22.76)	0.107549
	Female	2011	2014	APC	169.78	-8.94	699.29	169.78(-8.94-699.29)	0.070426
	Female	2014	2021	APC	-35.75	-44.59	-25.5	-35.75(-44.59--25.5)	<0.001
	Male	1990	2000	APC	-11.42	-17.68	-4.68	-11.42(-17.68--4.68)	0.00306
	Male	2000	2003	APC	-55.61	-83.32	18.12	-55.61(-83.32-18.12)	0.097274
	Male	2003	2008	APC	13.88	-18.08	58.3	13.88(-18.08-58.3)	0.413512
	Male	2008	2011	APC	-56.78	-85.36	27.65	-56.78(-85.36-27.65)	0.119528
	Male	2011	2014	APC	171.48	-7.13	693.56	171.48(-7.13-693.56)	0.065805
